# Supplementary material
Source: HighWire-hosted journal article supplement (http://www.ajevonline.org/highwire/filestream/9528/field_highwire_adjunct_files/0/Supplemental_Data.pdf)
Supplement: Supplemental_Data.pdf [file Supplemental_Data.pdf]

**Supplemental Data for:**

Haggerty JJ, Taylor DK and Jiranek V. 2016.

Monitoring volatile aroma compounds during fermentation in a chemically defined grape juice medium deficient in leucine.

Am J Enol Vitic 67:350-356. doi: 10.5344/ajev.2016.15026.

**Supplemental Table 1** Composition of model media for MS300 (Rossouw and Bauer 2009) and CDGJM (Henschke and Jiranek 1993). (Assimilable nitrogen was calculated as total nitrogen content excluding that from proline.)

| Component                           | MS300  | CDGJM  | Component                                            | MS300  | CDGJM  |
|-------------------------------------|--------|--------|------------------------------------------------------|--------|--------|
| pH (NaOH)                           | 3.3    | 3.23.5 | <b>Vitamins</b>                                      | (mg/L) | (mg/L) |
|                                     |        |        | Myoinositol                                          | 20     | 100    |
| <b>Sugars</b>                       | (g/L)  | (g/L)  | Nicotinic acid                                       | 2      | 2      |
| Glucose                             | 125    | 100    | Calcium pantothenate                                 | 1.5    | 1      |
| Fructose                            | 125    | 100    | Thiamine HCl                                         | 0.25   | 0.5    |
|                                     |        |        | Pyridoxine HCl                                       | 0.25   | 2      |
| <b>Amino acids</b>                  | (mg/L) | (mg/L) | Biotin                                               | 0.003  | 0.125  |
| Alanine                             | 145.3  | 100    | pAminobenzoic acid                                   |        | 0.2    |
| Arginine                            | 374.4  | 750    | Riboflavin                                           |        | 0.2    |
| Asparagine                          |        | 150    | Folic acid                                           |        | 0.2    |
| Aspartic acid                       | 44.5   | 350    |                                                      |        |        |
| Cysteine                            | 13.1   |        | <b>Mineral salts</b>                                 | (mg/L) | (mg/L) |
| Glutamic acid                       | 120.4  | 500    | K <sub>2</sub> SO <sub>4</sub>                       | 500    |        |
| Glutamine                           | 505.3  | 200    | NaCl                                                 | 200    |        |
| Glycine                             | 18.3   | 50     | MnSO <sub>4</sub> ·H <sub>2</sub> O                  | 4      |        |
| Histidine                           | 32.7   | 150    | ZnSO <sub>4</sub>                                    | 4      |        |
| Isoleucine                          | 32.7   | 200    | CuSO <sub>4</sub> ·5H <sub>2</sub> O                 | 1      |        |
| Leucine                             | 48.4   | 300    | KI                                                   | 1      |        |
| Lysine                              | 17.0   | 250    | CoCl <sub>2</sub> ·6H <sub>2</sub> O                 | 0.4    |        |
| Methionine                          | 31.4   | 150    | KH <sub>2</sub> PO <sub>4</sub>                      | 750    | 1140   |
| Phenylalanine                       | 37.9   | 150    | MgSO <sub>4</sub> ·7H <sub>2</sub> O                 | 250    | 1230   |
| Proline                             | 612.6  | 500    | CaCl <sub>2</sub> ·2H <sub>2</sub> O                 | 155    | 440    |
| Serine                              | 78.5   | 400    | H <sub>3</sub> BO <sub>3</sub>                       | 1      | 0.0057 |
| Threonine                           | 759.3  | 350    | NaMoO <sub>4</sub> ·2H <sub>2</sub> O                | 1      | 0.0242 |
| Tryptophan                          | 179.3  | 100    | Co(NO <sub>3</sub> ) <sub>2</sub> ·6H <sub>2</sub> O |        | 0.0291 |
| Tyrosine                            | 18.3   | 20     | CuCl <sub>2</sub>                                    |        | 0.0136 |
| Valine                              | 44.5   | 200    | FeCl <sub>2</sub>                                    |        | 0.0320 |
| Total amino acids                   | 3113.9 | 4870   | ZnCl <sub>2</sub>                                    |        | 0.1355 |
| Assimilable nitrogen (mg N/L)       | 419    | 723    | KIO <sub>3</sub>                                     |        | 0.0108 |
| Ammonium chloride                   | 460    | 100    | K tartrate                                           |        | 5000   |
| Total assimilable nitrogen (mg N/L) | 537    | 749    | L-Malic acid                                         |        | 3000   |
|                                     |        |        | Citric acid                                          |        | 200    |
|                                     |        |        | MnCl <sub>2</sub> ·4H <sub>2</sub> O                 |        | 0.1982 |

### Supplemental Data for:

Haggerty JJ, Taylor DK and Jiranek V. 2016.

Monitoring volatile aroma compounds during fermentation in a chemically defined grape juice medium deficient in leucine. *Am J Enol Vitic* 67:350-356. doi: 10.5344/ajev.2016.15026.

**Supplemental Table 2** Aroma compounds formed by *Saccharomyces cerevisiae* with odor activity values greater than 1.

| Compound                 | Aroma description          | Odor threshold ( $\mu\text{g/L}$ ) |
|--------------------------|----------------------------|------------------------------------|
| <b>Ethyl esters</b>      |                            |                                    |
| ethyl acetate            | pineapple, fruity, solvent | 7500                               |
| ethyl 2-methylpropanoate | sweet, rubber              | 15                                 |
| ethyl 2-methylbutanoate  | apple                      | 18/1                               |
| ethyl 3-methylbutanoate  | fruit                      | 3                                  |
| ethyl butanoate          | apple                      | 20                                 |
| ethyl hexanoate          | apple peel, fruit          | 14/5                               |
| ethyl octanoate          | fruit, fat                 | 2                                  |
| ethyl decanoate          | grape                      | 200                                |
| ethyl lactate            | fruit                      | 14                                 |
| ethyl dodecanoate        | soapy, estery              | -                                  |
| ethyl propanoate         | fruity                     | 1800                               |
| <b>Acetates</b>          |                            |                                    |
| 3-methylbutyl acetate    | banana                     | 30                                 |
| 2methylbutyl acetate     | fruit                      | 160                                |
| 2-phenylethyl acetate    | rose, honey, tobacco       | 250                                |
| hexyl acetate            | fruit, herb                | 670                                |
| 2-methylpropyl acetate   | fruit, apple, banana       | 1.6                                |
| <b>Acids</b>             |                            |                                    |
| 2-methylpropanoic acid   | rancid, butter, cheese     | 2300                               |
| 3-methylbutanoic acid    | sweat, acid, rancid        | 33.4                               |
| acetic acid              | sour                       | 200,000                            |
| 2-methylbutanoic acid    | cheese, sweaty             | 1500                               |
| butanoic acid            | rancid, cheese, sweat      | 173                                |
| hexanoic acid            | sweat                      | 420                                |
| octanoic acid            | sweat, cheese              | 500                                |
| decanoic acid            | rancid, fat                | 1000/8100                          |
| <b>Alcohols</b>          |                            |                                    |
| benzyl alcohol           | sweet, flower              | 900,000                            |
| butanol                  | wine, fusel, spiritous     | 150,000                            |
| 2-methyl propanol        | wine, solvent, bitter      | 40,000                             |
| 3-methyl butanol         | whisky, malt, burnt        | 30,000                             |
| 2methyl butanol          | wine, onion                | 65,000                             |
| 2phenyl ethanol          | honey, spice, rose, lilac  | 14,000/10,000                      |
| methionol                | sweet potato               | 1000                               |
| <i>n</i> -propanol       | alcohol, pungent           | 306,000                            |
| 2,3-butanediol           | fruity                     | 150,000                            |
| hexanol                  | resin, flower, green       | 8000                               |
| <b>Miscellaneous</b>     |                            |                                    |
| 2,3-butanedione          | butter                     | 100                                |

Aroma descriptors are from Flavournet (Acree and Arn 2004); odor thresholds determined in ~10% ethanol (Francis and Newton 2005, Ferreira et al. 2000, Guth 1997, Peinado et al. 2006, Peinado et al. 2004, Salo 1970, Siebert et al. 2005).

**Supplemental Data for:**

Haggerty JJ, Taylor DK and Jiranek V. 2016.

Monitoring volatile aroma compounds during fermentation in a chemically defined grape juice medium deficient in leucine.

Am J Enol Vitic 67:350-356. doi: 10.5344/ajev.2016.15026.

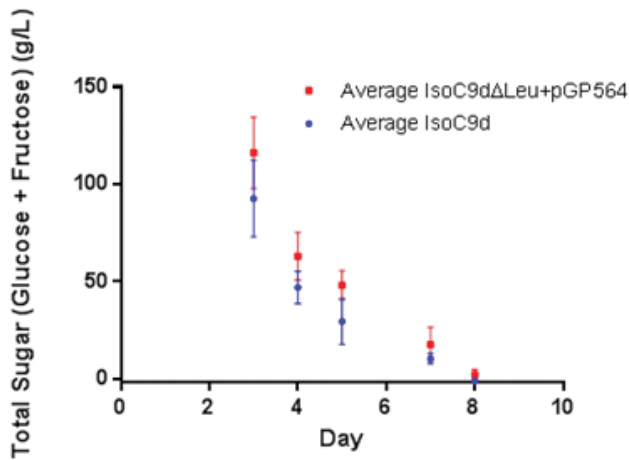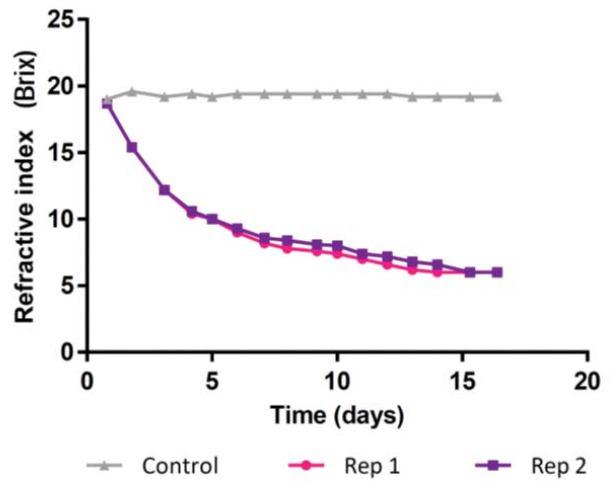

**Supplemental Figure 1** Fermentation kinetics of strains isoC9D and iso-C9DΔLEU+pGP564 grown in CDGJM lacking leucine. Fermentations were conducted in deep-well (~2 mL) plates and are reported as averages for each time point (n = 40).

**Supplemental Figure 2** Fermentation curve for replicate 1, replicate 2 of strain iso-C9DΔLEU+pGP564, and the uninoculated control, as measured by refractometry in Brix.

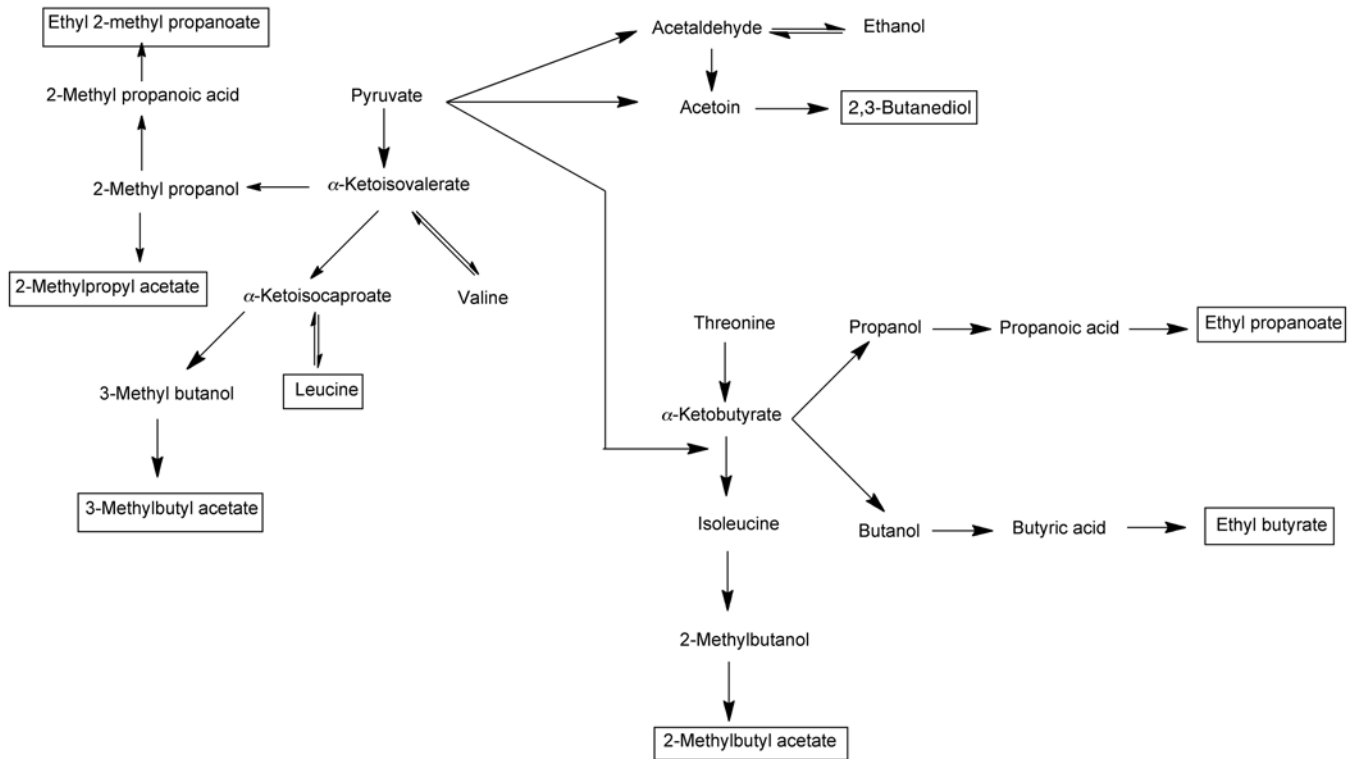

**Supplemental Figure 3** A simplified version of the pathways involved in the production of the aroma compounds linked to leucine biosynthesis (Baichwal et al. 1983, Bollon 1974, González et al. 2000, Guymon et al. 1961, Hazelwood et al. 2008, Ingraham et al. 1961).

## Supplemental Data for:

Haggerty JJ, Taylor DK and Jiranek V. 2016.

Monitoring volatile aroma compounds during fermentation in a chemically defined grape juice medium deficient in leucine.

Am J Enol Vitic 67:350-356. doi: 10.5344/ajev.2016.15026.

---

## References for Supplemental Material

- Acree T and Arn H. 2004. Flavornet. www.flavornet.org.
- Baichwal VR, Cunningham TS, Gatzek PR and Kohlhaw GB. 1983. Leucine biosynthesis in yeast: Identification of two genes (LEU4, LEU5) that affect  $\alpha$ -Isopropylmalate synthase activity and evidence that LEU1 and LEU2 gene expression is controlled by  $\alpha$ -Isopropylmalate and the product of a regulatory gene. *Curr Genet* 7:369-377.
- Bollon AP. 1974. Fine structure analysis of a eukaryotic multifunctional gene. *Nature* 250:630-634.
- Ferreira V, López R and Cacho JF. 2000. Quantitative determination of the odorants of young red wines from different grape varieties. *J Sci Food Agric* 80:1659-1667.
- Francis IL and Newton JL. 2005. Determining wine aroma from compositional data. *Aust J Grape Wine Res* 11:114-126.
- González E, Fernández MR, Larroy C, Solà L, Pericàs MA, Parés X and Biosca JA. 2000. Characterization of a (2R,3R)-2,3-butanediol dehydrogenase as the *Saccharomyces cerevisiae* YAL060W gene product. Disruption and induction of the gene. *J Biol Chem* 275:35876-35885.
- Guth H. 1997. Quantitation and sensory studies of character impact odorants of different white wine varieties. *J Agric Food Chem* 45:3027-3032.
- Guymon JF, Ingraham JL and Crowell EA. 1961. The formation of *n*-propyl alcohol by *Saccharomyces cerevisiae*. *Arch Biochem Biophys* 95:163-168.
- Hazelwood LA, Daran J-M, van Maris AJA, Pronk JT and Dickinson JR. 2008. The Ehrlich pathway for fusel alcohol production: A century of research on *Saccharomyces cerevisiae* metabolism. *Appl Environ Microbiol* 74:2259-2266.
- Henschke PA and Jiranek V. 1993. Yeasts-metabolism of nitrogen compounds. In *Wine Microbiology and Biotechnology*. GH Fleet (ed.), pp. 77-163. Harwood Academic Publishers GmbH, Cornwall.
- Ingraham JL, Guymon JF and Crowell EA. 1961. The pathway of formation of *n*-butyl and *n*-amyl alcohols by a mutant strain of *Saccharomyces cerevisiae*. *Arch Biochem Biophys* 95:169-175.
- Peinado RA, Moreno J, Bueno JE, Moreno JA and Mauricio JC. 2004. Comparative study of aromatic compounds in two young white wines subjected to pre-fermentative cryomaceration. *Food Chem* 84:585-590.
- Peinado RA, Mauricio JC and Moreno J. 2006. Aromatic series in sherry wines with gluconic acid subjected to different biological aging conditions by *Saccharomyces cerevisiae* var. *capensis*. *Food Chem* 94:232-239.
- Rossouw D and Bauer FF. 2009. Comparing the transcriptomes of wine yeast strains: Toward understanding the interaction between environment and transcriptome during fermentation. *Appl Microbiol Biotechnol* 84:937-954.
- Salo P. 1970. Determining the odor thresholds for some compounds in alcoholic beverages. *J Food Sci* 35:95-99.
- Siebert TE, Smyth HE, Capone DL, Neuwöhner C, Pardon KH, Skouroumounis GK, Herderich MJ, Sefton MA and Pollnitz AP. 2005. Stable isotope dilution analysis of wine fermentation products by HS-SPME-GC-MS. *Anal Bioanal Chem* 381:937-947.
